# Supplementary material
Source: Springer Nature journal article supplement (https://www.springermedizin.de/resource/supplementary/12891_2012_1458_MOESM12_ESM.pdf/9507966)

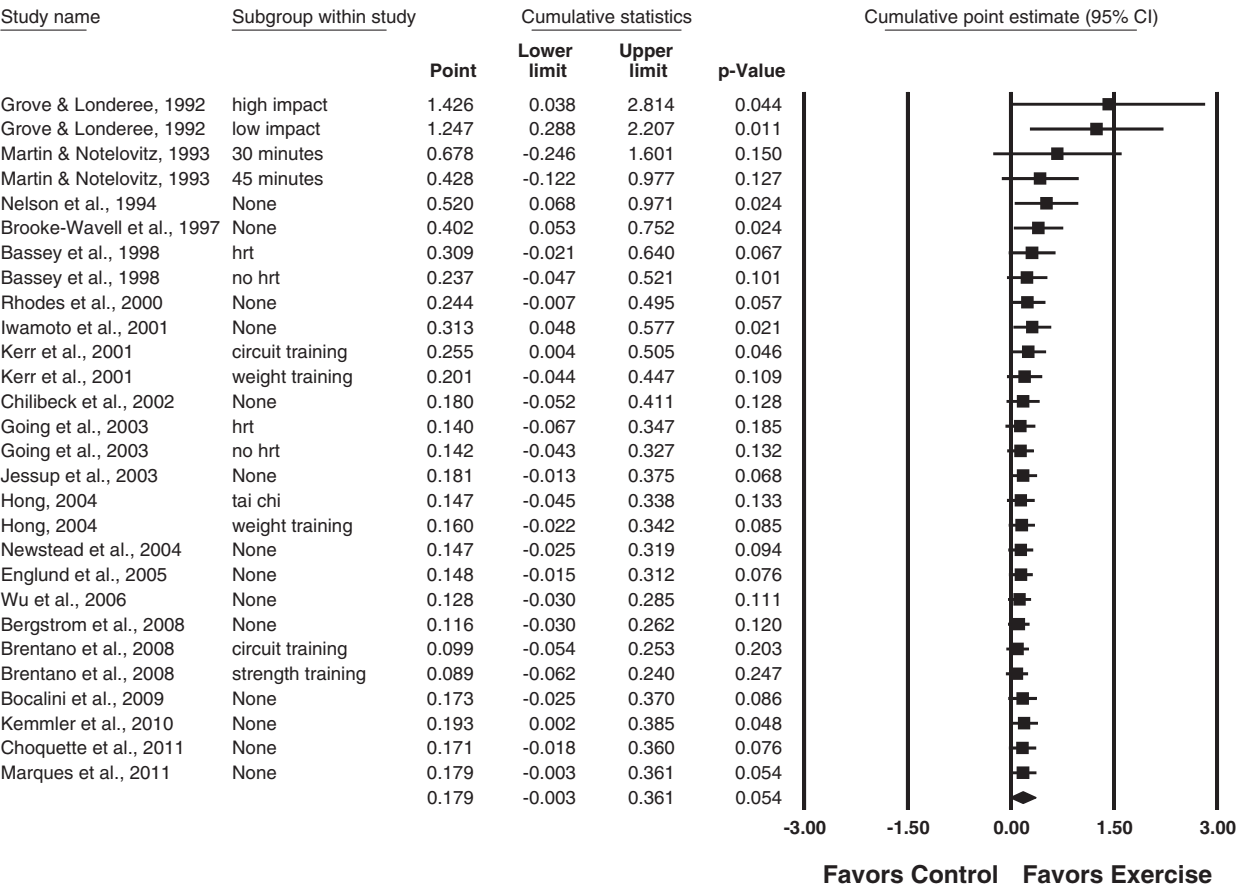

Supplement: MOESM12 [file 9507966]
